# Supplementary material for: Targeted suppression of mTORC2 reduces seizures across models of epilepsy
Source: Springer Nature journal article supplement (doi:10.1038/s41467-023-42922-y), 2023-11-14
Supplement: MOESM1 [file 41467_2023_42922_MOESM1_ESM.pdf]

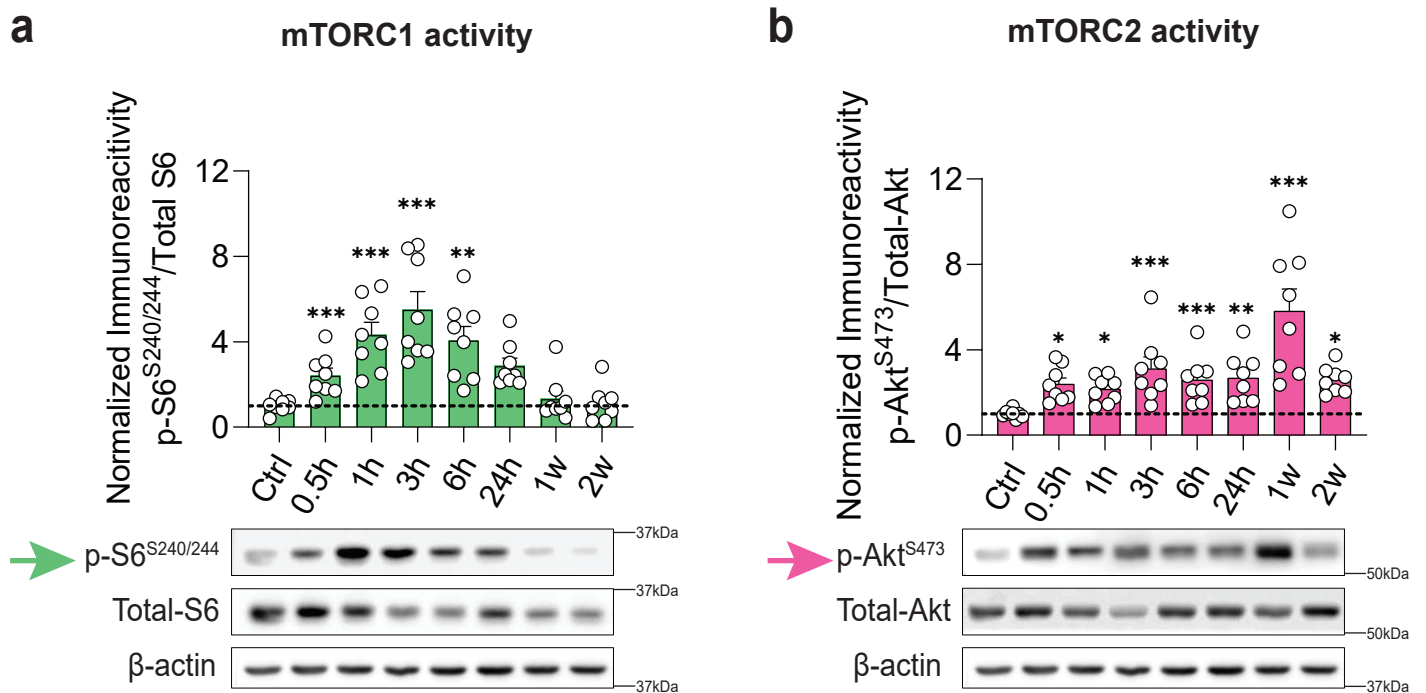

**Supplementary Figure 1. KA activates mTORC2 more persistently than mTORC1.**

**a, b**, mTOR complexes activity after KA injection. Quantification and representative western blots of mTORC1 activity measured by p-S6<sup>S240/244</sup> (**a**,  $F = 11.58$ ,  $P < 0.001$ ) and mTORC2 activity measured by p-Akt<sup>S473</sup> (**b**,  $F = 47.94$ ,  $P < 0.001$ ) in the hippocampus of WT mice ( $n = 8$  per group, each timepoint is compared to naive (ctrl) mice). Data are represented as means  $\pm$  s.e.m. \* $P < 0.05$ , \*\* $P < 0.01$ , \*\*\* $P < 0.001$ .

## KA Challenge

**a**

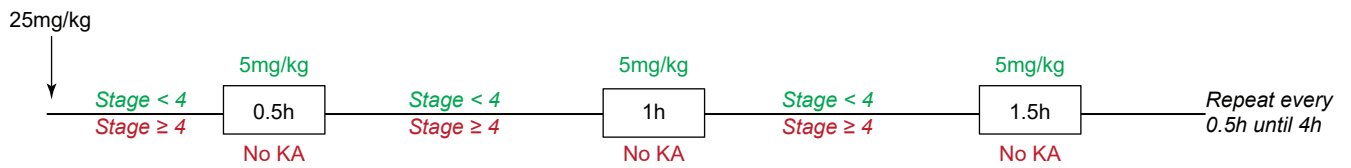

## Modified Racine Scale

**b**

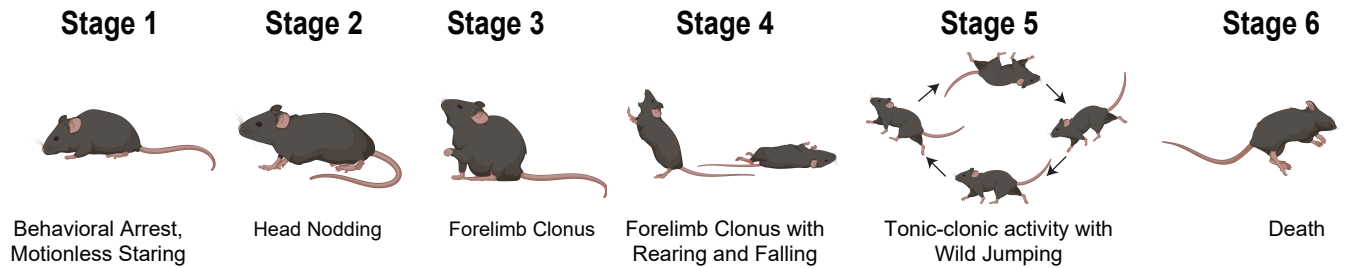

Created with BioRender.com.

**Supplementary Figure 2. KA-induced behavioral seizure scoring. a, b, Schematic for KA behavioral seizure challenge (a) and modified Racine Scale (b).**

**a**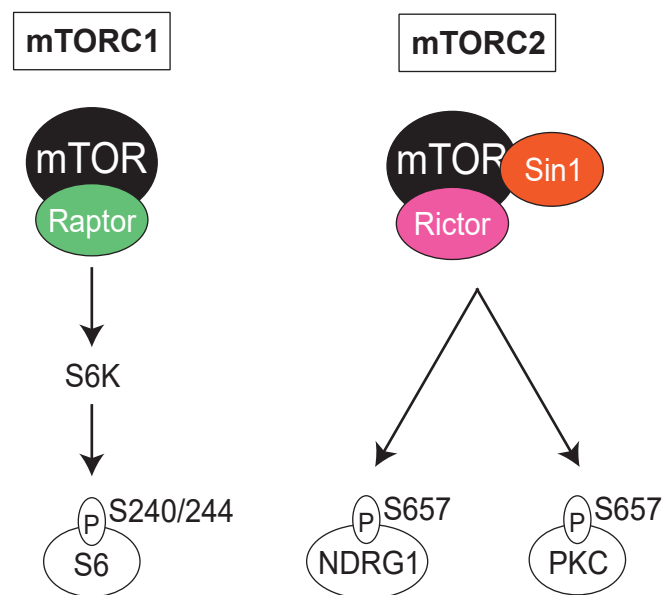**b**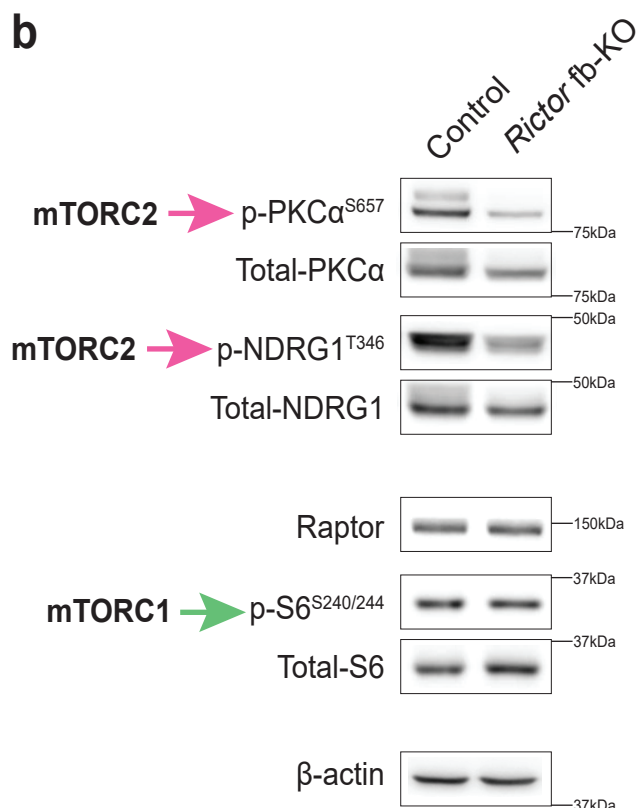**c**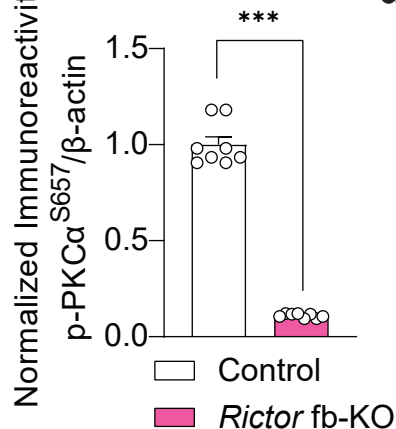**d**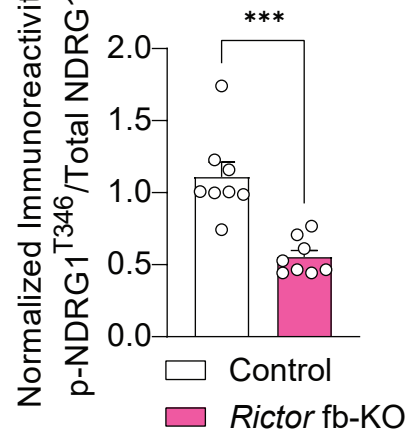**e**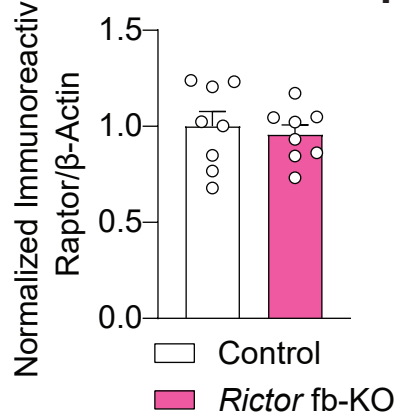**f**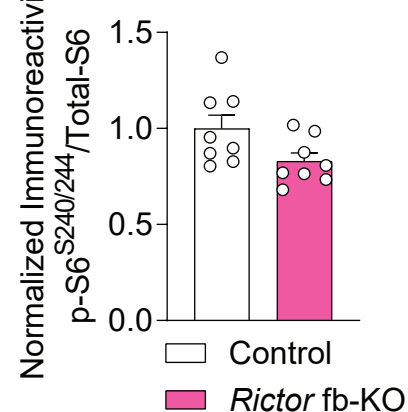

**Supplementary Figure 3. Genetic deletion of *Rictor* selectively reduces mTORC2 activity.** a-f, mTOR activity in *Rictor* fb-KO mice. a, Schematic of mTORC1 and mTORC2 targets. Representative western blots (b) and quantification of mTORC2 activity measured by p-PKCa<sup>S657</sup> (c, U = 0, P < 0.001) and p-NDRG1<sup>T346</sup> (d, U = 1, P < 0.001) from the cortex of control and *Rictor* fb-KO mice. Quantification of Raptor levels (e, t = 0.4578, P = 0.65) and mTORC1 activity measured by p-S6<sup>S240/244</sup> (f, t = 2.092, P = 0.06) from the cortex of control and *Rictor* fb-KO mice (n = 8 per group). Data are represented as means ± s.e.m. \*P < 0.05, \*\*P < 0.01, \*\*\*P < 0.001.

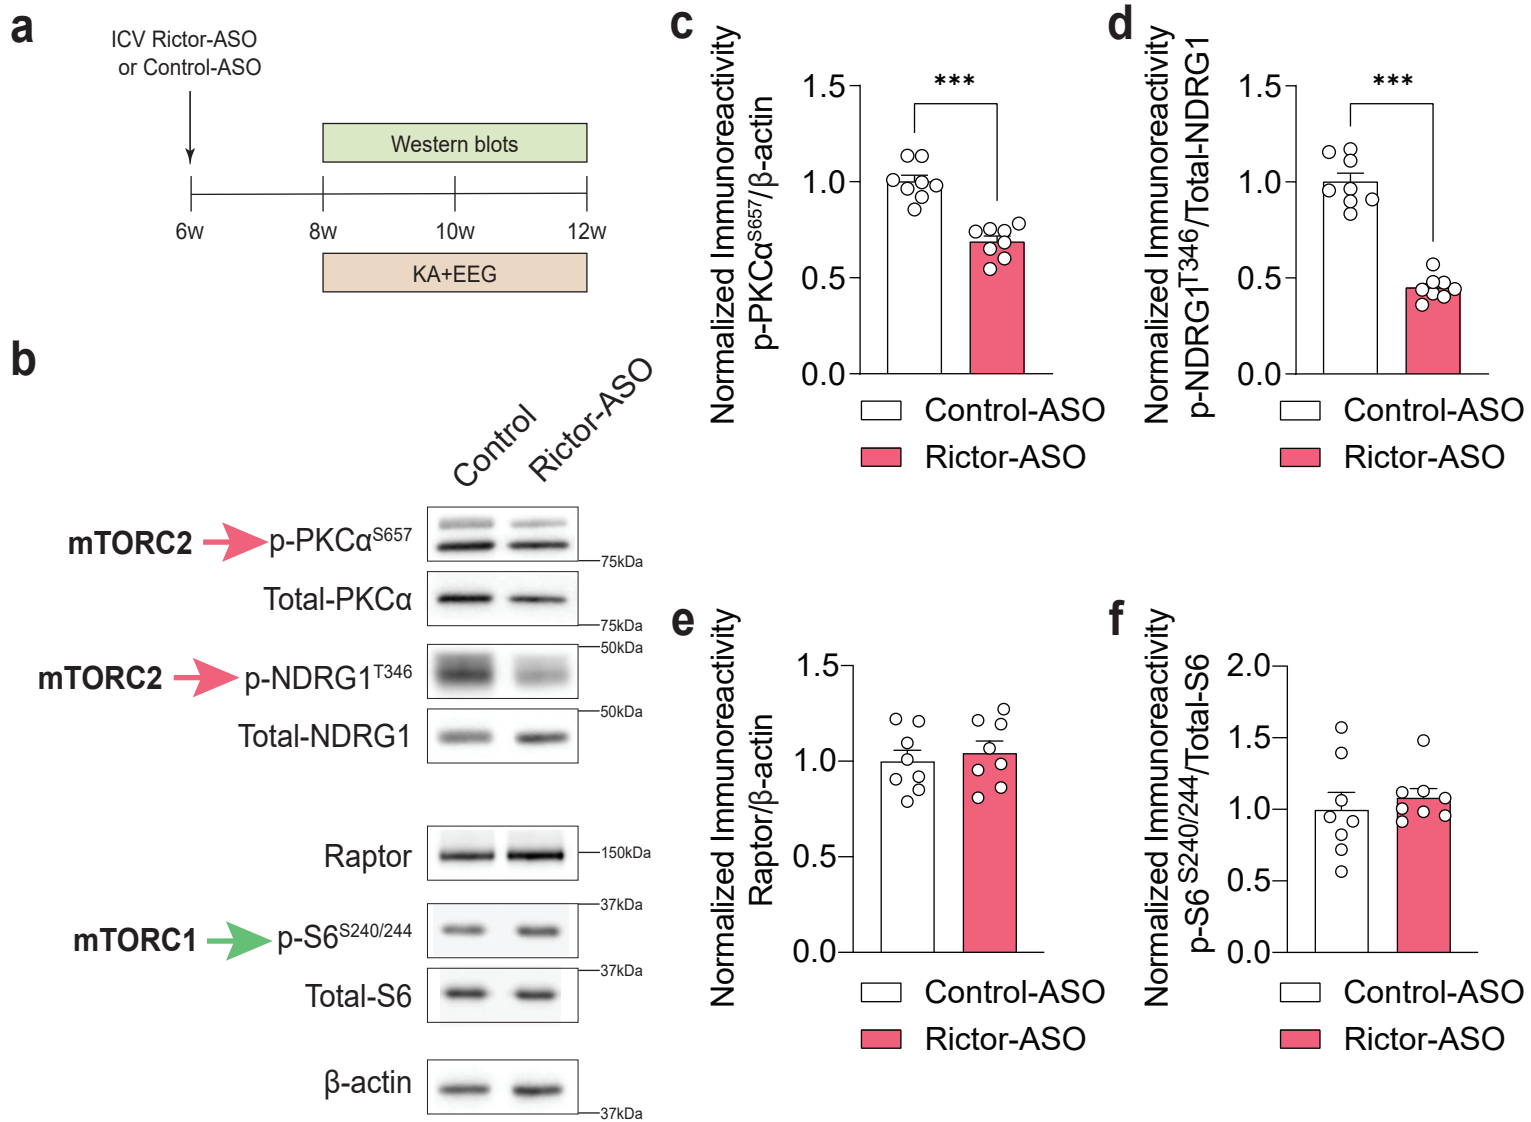

**Supplementary Figure 4. ASO-mediated suppression of Rictor selectively reduces mTORC2 activity.**

**a**, Timeline of ASO treatment, western blots and EEG recording from WT mice. Representative western blots (**b**) and quantification of mTORC2 activity measured by p-PKCα<sup>657</sup> (**c**,  $t = 6.917$ ,  $P < 0.001$ ) and p-NDRG1<sup>T346</sup> (**d**,  $t = 10.94$ ,  $P < 0.001$ ) from the cortex of control and Rictor-ASO treated mice. Quantification of Raptor levels (**e**,  $t = 0.6508$ ,  $P = 0.526$ ) and mTORC1 activity measured by p-S6<sup>S240/244</sup> (**f**,  $t = 0.3661$ ,  $P = 0.72$ ) from the cortex of control and Rictor-ASO treated mice ( $n = 8$  per group). Data are represented as means  $\pm$  s.e.m. \* $P < 0.05$ , \*\* $P < 0.01$ , \*\*\* $P < 0.001$ .



## mTOR activity

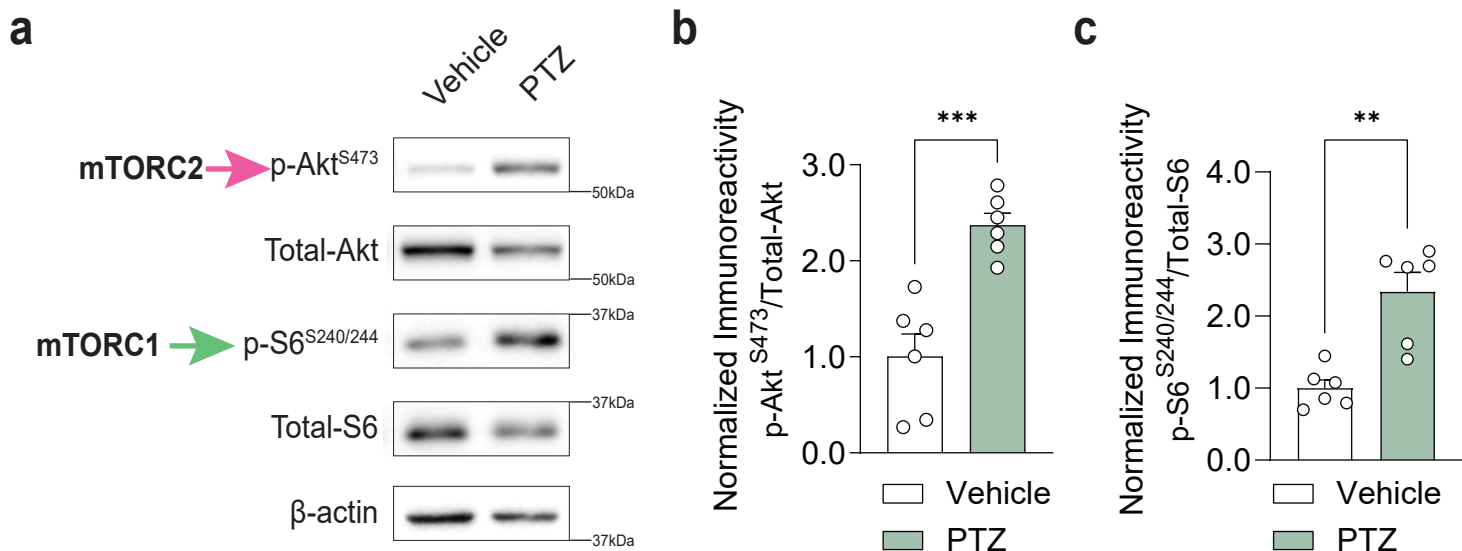

## Experimental Scheme

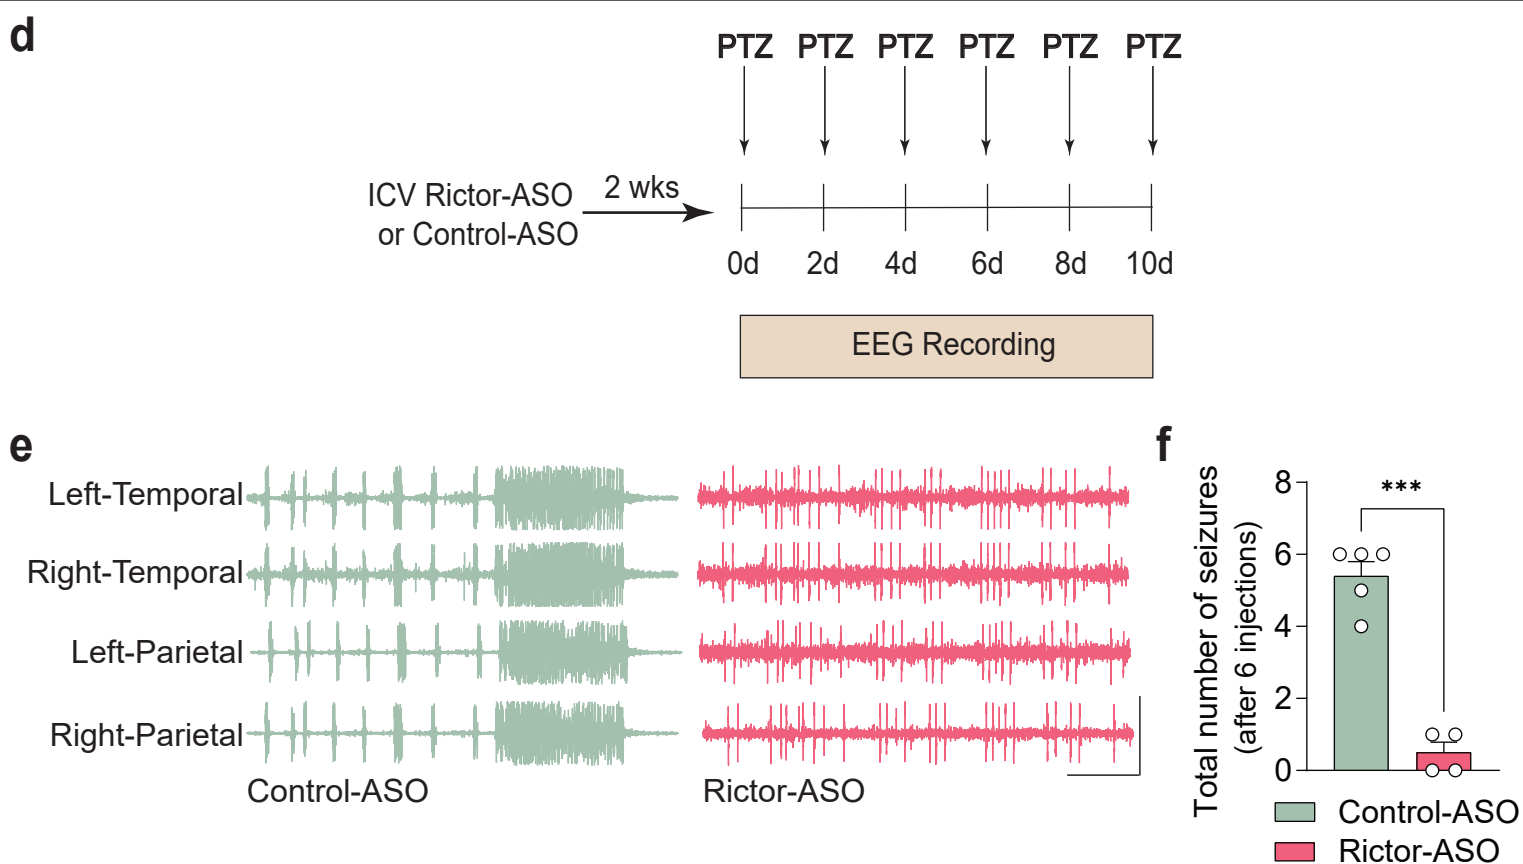

### Supplementary Figure 5. Rictor-ASO treatment suppresses acute PTZ-induced seizures.

**a-c**, mTORC2 activity in the PTZ model. Representative western blots (a) and quantification of mTORC2 activity measured by p-Akt<sup>S473</sup> (b,  $t = 5.053$ ,  $P < 0.001$ ) and mTORC1 activity measured by p-S6<sup>S240/244</sup> (c,  $U = 1$ ,  $P = 0.0043$ ) in the cortex of vehicle or PTZ-treated WT mice ( $n = 6$  per group, mice were injected with 75 mg/kg PTZ or vehicle and tissue was collected 30 minutes after injection). **d**, Schematic for control-ASO or Rictor-ASO treatment in PTZ-kindling model. **e-f**, PTZ-induced seizures in control-ASO and Rictor-ASO treated mice. Representative EEG traces (e) and quantification (f) of total number of EEG seizures up to 1h post-PTZ injection in control-ASO ( $n = 5$ ) and Rictor-ASO ( $n = 4$ ) treated mice ( $t = 9.933$ ,  $P < 0.001$ ). Data are represented as means  $\pm$  s.e.m. \* $P < 0.05$ , \*\* $P < 0.01$ , \*\*\* $P < 0.001$ .

# *Kcna1*-null channelopathy model

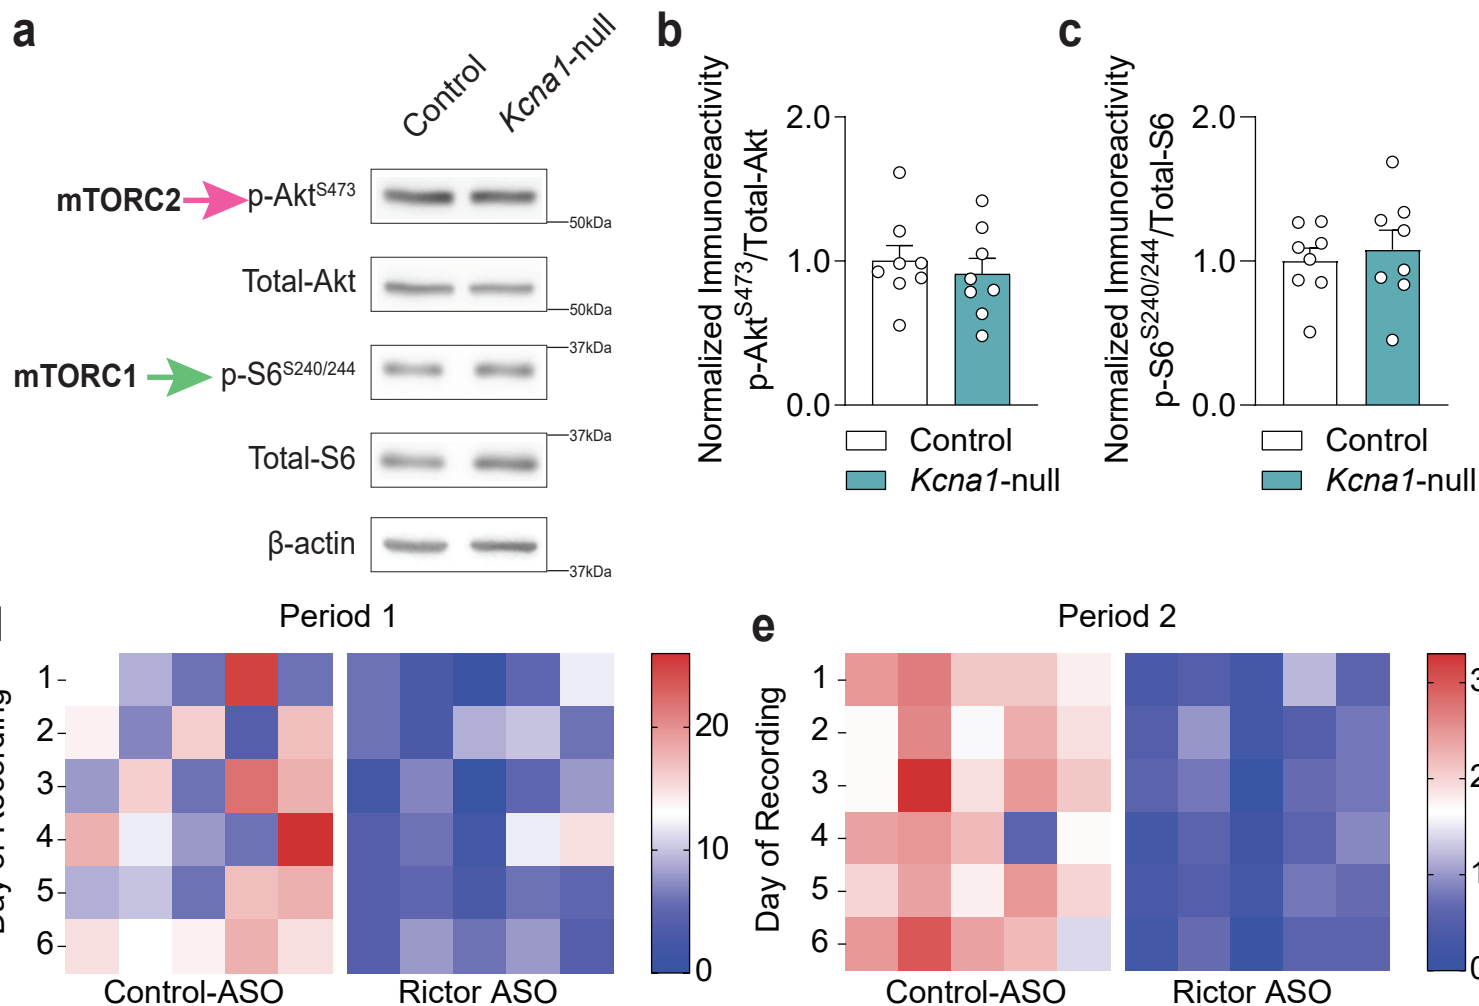

# *MTOR*<sup>S2215F</sup> gain-of-function model

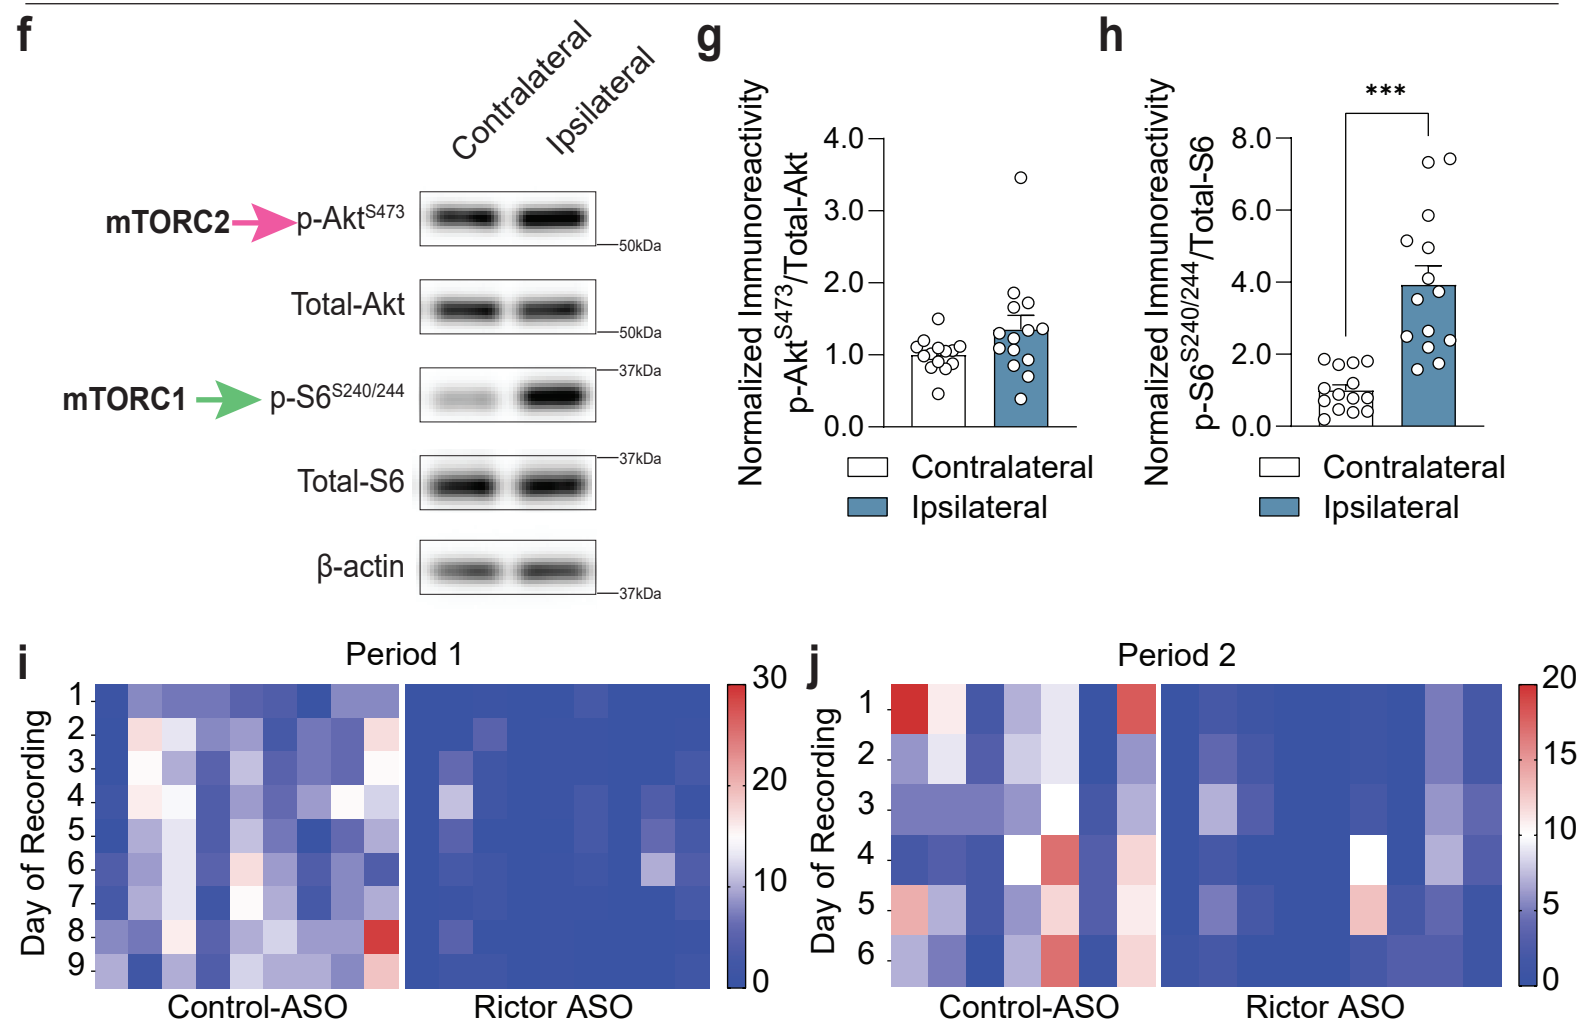

**Supplementary Figure 6. Rictor-ASO treatment suppresses seizures in two preclinical models of epilepsy. a-c**, mTOR complex activity in 4-week-old *Kcna1*-null mice. Representative western blots (**a**) and quantification of mTORC1 (**b**,  $t = 0.1970$ ,  $P = 0.85$ ) and mTORC2 (**c**,  $t = 1.008$ ,  $P = 0.3307$ ) activity in control and *Kcna1*-null mice ( $n = 8$  per group). **d-e**, Seizure frequency in Rictor-ASO treated *Kcna1*-null mice. Heatmap of number of seizures per day for Period 1 (**d**,  $P = 0.034$ ) and Period 2 (**e**,  $P < 0.001$ ) in control and *Kcna1*-null mice ( $n = 5$  per group). **f-h**, mTOR complex activity in 6-week-old *MTORS*<sup>2215F</sup> mice. Representative western blots (**f**) and quantification of mTORC1 (**g**,  $t = 5.392$ ,  $P < 0.001$ ) and mTORC2 (**h**,  $U = 61$ ,  $p = 0.09$ ) activity in *MTORS*<sup>2215F</sup> mice. **i-j**, Seizure frequency in Rictor-ASO treated *MTORS*<sup>2215F</sup> mice. Heatmap of number of seizures per day for Period 1 (**i**,  $P < 0.001$ ) and Period 2 (**j**,  $P < 0.001$ ) in Control ( $n = 9, 7$ ) or *MTORS*<sup>2215F</sup> ( $n = 9, 9$ ) mice. Data are represented as means  $\pm$  s.e.m. \* $P < 0.05$ , \*\* $P < 0.01$ , \*\*\* $P < 0.001$ .

## Open Field

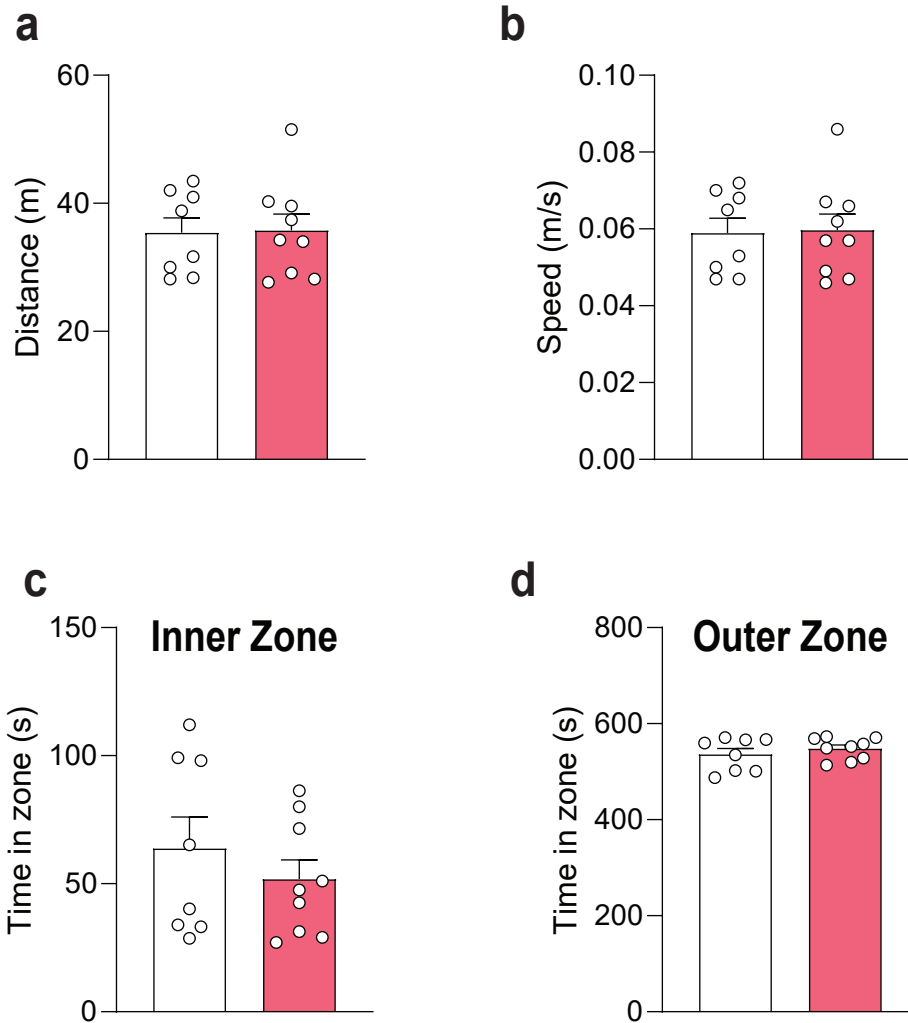

## Novel Object Recognition

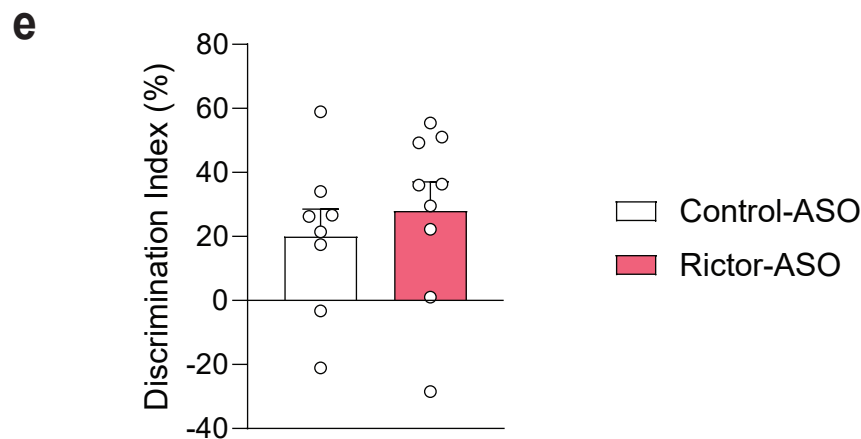

**Supplementary Figure 7. Rictor-ASO treatment does not affect activity levels or learning and memory in wildtype mice.** **a-d**, Activity levels in 8-week-old control or Rictor-ASO treated mice. Distance traveled (**a**,  $t = 0.101$ ,  $P = 0.9209$ ), average speed (**b**,  $t = 0.1165$ ,  $P = 0.9088$ ), time spent in inner zone (**c**,  $t = 0.8564$ ,  $P = 0.4502$ ) and time spent in outer zone (**d**,  $t = 0.8568$ ,  $P = 0.4050$ ) in the open field arena. Object recognition memory in control and Rictor-ASO treated mice as measured by discrimination index (**e**,  $t = 0.6425$ ,  $P = 0.5302$ ) in the novel object recognition test ( $n = 8$  mice per group). Data are represented as means  $\pm$  s.e.m. \* $P < 0.05$ , \*\* $P < 0.01$ , \*\*\* $P < 0.001$ .
